# Supplementary material for: Homozygous noncanonical splice variant in LSM1 in two siblings with multiple congenital anomalies and global developmental delay
Source: PubMed Central journal article supplement (PMC6549555; doi:10.1101/mcs.a004101), 2019-06
Supplement: supp_mcs.a004101_Supplemental_Fig_S1.pdf [file supp_mcs.a004101_Supplemental_Fig_S1.pdf]

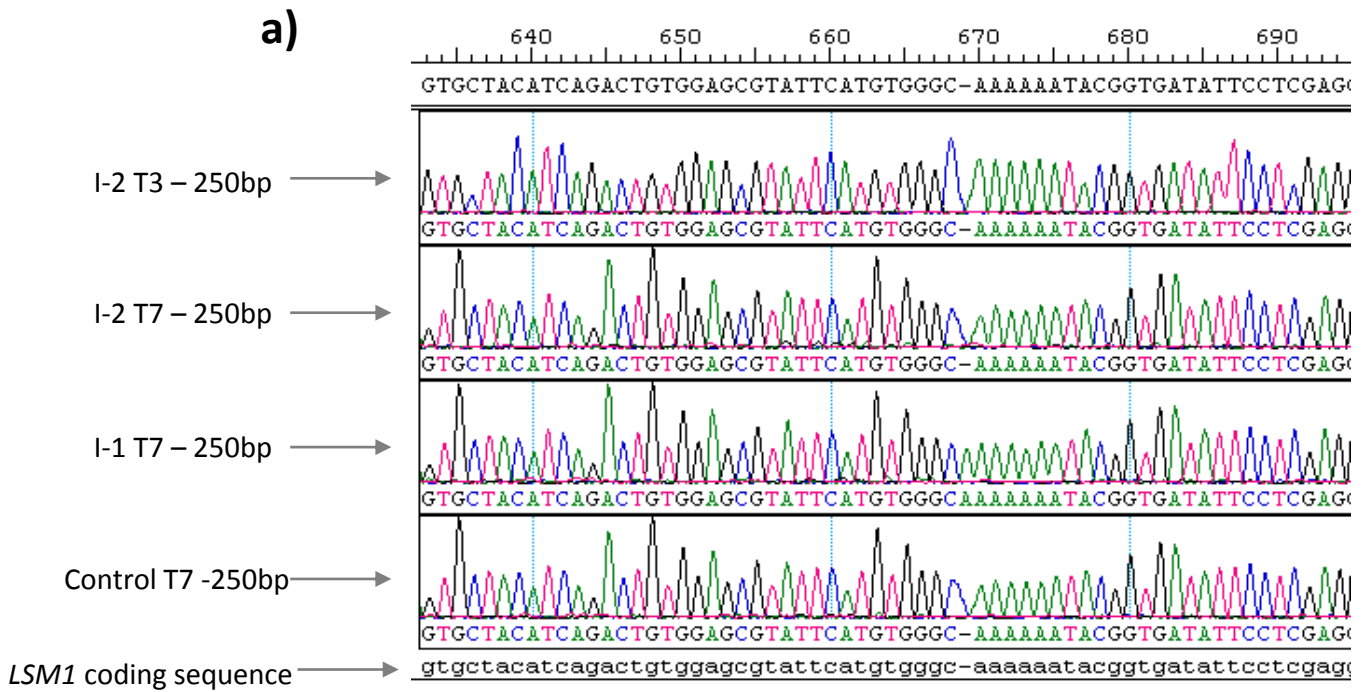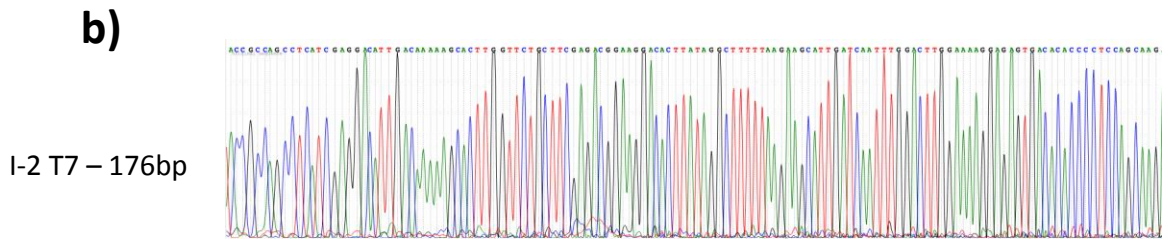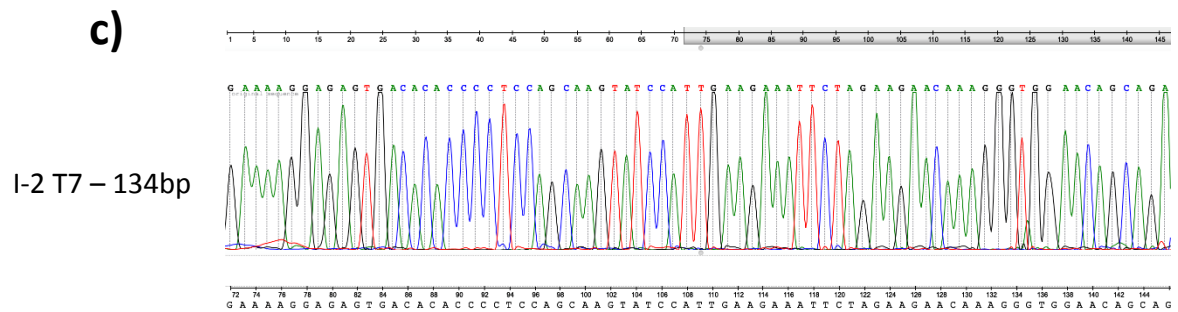

**Supplemental Figure S1.** Sequencing of PCR products of I-1, I-2, and Control cDNAs cloned into TOPO vector (Invitrogen). **a)** The sequence of 250-bp product with primer set 1 corresponds to NM\_014462.3. **b)** The sequence of 176-bp product with primer set 2 corresponds to NM\_014462.3 and NR\_045493.1. **c)** The sequence of 134-bp product with primer set 1 corresponds to NR\_045492.1. Clones were purified by plasmid Miniprep purification kit (Qiagen) and were sequenced using T3 and T7 universal primers.
